# Supplementary material for: Colonization of novel algal habitats by juveniles of a marine tube-dwelling amphipod
Source: PeerJ. 2020 Oct 15;8:e10188. doi: 10.7717/peerj.10188 (PMC7568853; doi:10.7717/peerj.10188)
Supplement: Supplemental Information 1 [file peerj-08-10188-s001.xlsx]

## Sheet: Habitat Quality_field
habitat	replicate	algal.area	n.juv	n.cymadusa.filosa			* Field experiment testing the effect of habitat quality on juveniles' colonization
artificial	1	111.241	2	2
artificial	2	105.731	0	0			habitat: treatments with natural or artificial algal thalli (factor)
artificial	3	107.201	1	1			replicate: 1-5
artificial	4	105.202	1	1			algal.area: surface area of algal thalli
artificial	5	111.522	2	2			n.juv: number of juvenile amphipods
natural	1	112.065	3	3			n.cymadusa.filosa: number of C. filosa juveniles (response variable)
natural	2	149.311	2	2
natural	3	89.6999	1	1
natural	4	134.25	4	4
natural	5	93.5143	1	1

## Sheet: Habitat Quality_lab
habitat (source.novel)	replicate	proportion			* Laboratory experiment testing the effect of habitat quality on juveniles' colonization
natural.artificial	1	0
natural.artificial	2	0			habitat (source.novel): treatments with different combinations of source and novel habitats (factor)
natural.artificial	3	0			replicate: 1-6
natural.artificial	4	0.05			proportion: proportion of juveniles that colonized the novel habitat (response variable)
natural.artificial	5	0
natural.artificial	6	0
natural.natural	1	0.315789
natural.natural	2	0.347826
natural.natural	3	0.352941
natural.natural	4	0.176471
natural.natural	5	0.142857
natural.natural	6	0.157895
artificial.natural	1	0.8125
artificial.natural	2	0.764706
artificial.natural	3	0.933333
artificial.natural	4	0.7
artificial.natural	5	0.857143
artificial.natural	6	1
artificial.artificial	1	0.125
artificial.artificial	2	0.166667
artificial.artificial	3	0.176471
artificial.artificial	4	0.4
artificial.artificial	5	0.190476
artificial.artificial	6	0.388889

## Sheet: Algal patch size_field
algal.size	replicate	algal.area	n.cymadusa.filosa				* Field experiment testing the effect of algal patch size on juveniles' colonization
small	1	47.0858	3
small	2	35.2911	0				algal.size: treatments with small or large algal thalli (factor)
small	3	9.32418	2				replicate: 1-5
small	4	33.8968	1				algal.area: surface area of algal thalli
small	5	28.3505	0				n.cymadusa.filosa: number of C. filosa juveniles (response variable)
large	1	112.065	3
large	2	149.311	2
large	3	89.6999	1
large	4	134.25	4
large	5	93.5143	1

## Sheet: Presence of adults_field
adults	replicate	algal.wet.mass	n.juv	n.cymadusa.filosa			* Field experiment testing the effect of presence of adutls on juveniles' colonization
0	1	4.575	5	0
0	2	3.604	25	1			adults: treatments with 0, 4 or 8 adults (factor)
0	3	3.622	25	4			replicate: 1-5 or 1-4
0	4	3.387	42	14			algal.wet.mass: wet mass of algal thalli
0	5	3.939	29	5			n.juv: number of juvenile amphipods
4	1	4.535	14	3			n.cymadusa.filosa: number of C. filosa juveniles (response variable)
4	2	4.023	7	5
4	3	4.393	29	11
4	4	3.607	24	8
4	5	2.45	18	5
8	1	3.378	8	4
8	2	3.346	7	7
8	3	2.98	38	27
8	4	2.811	32	14

## Sheet: Presence of adults_lab
source.habitat	adults	replicate	proportion			* Laboratory experiment testing the effect of both type of source habitat and presence of adults on juveniles' colonization
none	0	1	0.615385
none	0	2	1			source.habitat: treatments with none, natural or artificial algal thalli as source habitat for juveniles (factor)
none	0	3	1			adults: treatments with 0 or 4 adults on novel algal habitats (factor)
none	0	4	1			replicate: 1-6
none	0	5	1			proportion: proportion of juveniles that colonized the novel habitat (response variable)
none	0	6	1
none	4	1	0.785714
none	4	2	0.588235
none	4	3	0.866667
none	4	4	0.5
none	4	5	0.533333
none	4	6	0.529412
natural	0	1	0.125
natural	0	2	0.133333
natural	0	3	0.176471
natural	0	4	0.1875
natural	0	5	0.0555556
natural	0	6	0.0555556
natural	4	1	0.0625
natural	4	2	0.333333
natural	4	3	0.285714
natural	4	4	0.230769
natural	4	5	0.125
natural	4	6	0.363636
artificial	0	1	0.8125
artificial	0	2	0.764706
artificial	0	3	0.933333
artificial	0	4	0.7
artificial	0	5	0.857143
artificial	0	6	1
artificial	4	1	0.526316
artificial	4	2	0.25
artificial	4	3	0.565217
artificial	4	4	1
artificial	4	5	1
artificial	4	6	0.727273
